**The impact of ethical implications intertwined with tuberculosis household contact investigation:  
a qualitative study**

**Authors:** Mlambo, LM<sup>1</sup>, Milovanovic, M<sup>1,2</sup>, Hanrahan, CF<sup>3</sup>, Motsomi KW<sup>1</sup>, Morolo, MT<sup>4</sup>,  
Mohlamonyane, MP,<sup>1</sup> Albaugh, NW<sup>3,6</sup>, Ahmed, K<sup>4,7</sup>, Martinson, NA<sup>1,5</sup>, Dowdy, DW<sup>3</sup>, West, NS.<sup>7,#</sup>

<sup>1</sup>Perinatal HIV Research Unit, University of the Witwatersrand, Soweto, South Africa

<sup>2</sup>African Potential Group, Johannesburg, South Africa

<sup>3</sup>Department of Epidemiology, Johns Hopkins Bloomberg School of Public Health, Baltimore,  
Maryland, United States of America

<sup>4</sup>Setshaba Research Centre, Soshanguve, South Africa

<sup>5</sup>Johns Hopkins University Center for TB Research, Baltimore, Maryland, United States of America

<sup>6</sup>Department of Epidemiology, UNC Gillings School of Global Public Health, Chapel Hill, North  
Carolina, United States of America

<sup>7</sup>Division of Pulmonary and Critical Care Medicine, University of California San Francisco, San  
Francisco, CA, United States of America

<sup>#</sup>Corresponding Author:

Nora S. West, [Nora.West@ucsf.edu](mailto:Nora.West@ucsf.edu)

1 **Abstract (313/350 words)**

2 **Background:** Household contact investigation (HCI) is an effective and widely used approach to  
3 identify persons with tuberculosis (TB) disease and infection, globally. Despite widespread  
4 recommendations for the use of HCI, there remains poor understanding of the impact on and value  
5 of contact investigation for participants. Further, how HCI as a practice impacts psychosocial factors,  
6 including stigma and possible unintended disclosure of illness among persons with TB, their families,  
7 and communities, is largely unknown.

8 **Methods:** This exploratory qualitative study nested within a randomized trial (ClinicalTrials.gov:  
9 NCT04520113, 17 August 2020) was conducted in South Africa to understand the impacts of HCI on  
10 index patients living with TB and their household contact persons in two rural districts in the  
11 Limpopo province (Vhembe and Capricorn) and Soshanguve, a peri-urban township in Gauteng  
12 province. People with TB and household members of people with TB were recruited to participate in  
13 in-depth interviews and focus group discussions using semi-structured guides. We explored  
14 individual, interpersonal, and community-level perceptions of potential impacts of household  
15 contact investigation to elucidate their perceptions of HCI. Thematic analysis identified key themes.

16 **Results:** Twenty-four individual interviews and six focus group discussions (n=39 participants) were  
17 conducted. Participants viewed HCI as an effective approach to finding TB cases, helpful in educating  
18 households about TB symptoms and reducing barriers to health-related services. At the  
19 interpersonal level, HCI aided people with TB in safely disclosing their TB status to family members  
20 and facilitated family and social support for accountability. The introduction of HIV testing during  
21 HCI was reported by some participants as making household members slightly uncomfortable,  
22 decreasing interest in household members being tested for TB. HCI negatively impacted community-  
23 level TB and HIV-related stigma due to healthcare worker visibility at home.

24 **Conclusion:** Our data suggests varying impacts of HCI on people with TB, their families and  
25 interpersonal relationships, and communities, highlighting the importance of considering

26 approaches that address concerns about community stigma and HIV testing to enhance acceptance

27 of HCI.

28

29 **Parent Trial registration:** ClinicalTrials.gov: NCT04520113

30 **Keywords:** Tuberculosis, Qualitative research, South Africa, Household Contact Investigation, Ethics

## 31 **Background**

32 The World Health Organization (WHO) has proposed an ambitious strategy to end the global TB  
33 epidemic by 2035 (1). To meet this goal, urgent attention is needed to factors that may influence the  
34 success of routine programmatic approaches, such as screening of household members of people  
35 diagnosed with TB.

36 Identifying people with TB and those at substantial risk of TB infection remains essential for global  
37 health and development (1, 2). Most people with TB are diagnosed passively by presentation at  
38 health facilities (3). However, persistent barriers contribute to clinic attendance: being  
39 asymptomatic (e.g., subclinical or early TB disease) (3), lack of knowledge about TB or TB symptoms  
40 (4, 5), financial costs (6), transport availability, and facility proximity (7, 8). A common approach to  
41 ensuring contact persons access TB screening and are linked to care is household contact  
42 investigation (HCI) (9). Though approaches may vary by setting, HCI typically involves healthcare  
43 workers visiting the home of a newly diagnosed person with TB and screening and/or testing  
44 household members for TB symptoms. However, HCI may cause potential ethical challenges. Though  
45 scant, there is some evidence that HCI may increase stigma, discrimination, and blame for people  
46 with TB; a better understanding of these challenges can help ensure that any potential harms are  
47 mitigated (10-12).

48 Previous studies conducted in South Africa have found that screening for TB in the home setting,  
49 though often associated with psychosocial and logistical challenges, may reduce barriers to testing  
50 other household members (13, 14). As HCI is increasingly prioritized in high-burden settings like  
51 South Africa (15-17), understanding the ethical implications associated with HCI is critical to ensuring  
52 that TB researchers and program planners alike address the less tangible benefits and potentially  
53 harmful impacts of HCI. Therefore, the goal of this study was to use qualitative methodology to  
54 explore how stigma, confidentiality, and disclosure manifest in the context of HCI and impact people

55 diagnosed with TB, their household members, and interpersonal relationships within the household  
56 and community in rural and peri-urban settings in South Africa.

## 57 **Methods**

### 58 *Study Setting and Design*

59 We conducted an exploratory qualitative study in South Africa to understand the impacts of HCI,  
60 with a focus on ethical factors, among people living with TB and their household members. Focus  
61 group discussions (FGDs) and in-depth interviews (IDIs) were used to collect data on both individual  
62 and group-level perceptions. This study was nested within a larger randomized trial of two novel TB  
63 HCI intervention approaches: the Kharituwe trial. The two novel TB HCI interventions included 1) HCI  
64 on holidays in rural areas and 2) HCI on evenings and weekends in urban areas compared to the  
65 standard HCI (during working hours). The trial was conducted among people with active TB and their  
66 household members in 12 hospitals across Vhembe and Capricorn districts in Limpopo Province, plus  
67 33 clinics and two hospitals in Soshanguve and surrounding areas (a mix of urban and peri-urban  
68 communities spanning the borders of Gauteng and North West provinces). Eligibility and  
69 recruitment procedures for the trial are described elsewhere (18).

### 70 *Participant Recruitment and Sample*

71 Potential participants aged 18 years and older were purposively selected from among Kharituwe trial  
72 participants and approached to consider providing informed consent, which was obtained before  
73 being interviewed in either a focus group or an interview, with attention to ensuring a balance of  
74 recruitment between sites as well a balance of gender and age within the sample.

### 75 *Data Collection*

76 From June 12<sup>th</sup>, 2021, to February 23<sup>rd</sup>, 2022, we conducted 24 IDIs among people living with TB  
77 (n=12) and people living in their households (n=12), plus six FGDs with people living with TB (n=15)  
78 and TB household contact persons (n=24). IDIs and FGDs were conducted in English, Tshivenda,

79 Sepedi, Tsonga, or Setswana languages and facilitated by experienced qualitative interviewers and  
80 focus group leaders who received additional training on the study aims and data collection  
81 instruments. All IDIs and FGDs were conducted in a confidential space at either the local health  
82 facility or study offices.

83 For interviews, the study team developed a semi-structured interview guide to elicit individual-level  
84 perceptions and insights on the experiences with and ethics of HCI (Supplementary File 1). Interview  
85 guides were structured to explore the following domains in the context of HCI: TB/HIV disclosure  
86 preferences, perceived stigma/blame associated with testing for TB or having a new TB diagnosis,  
87 community stigma or blame resulting from HCI; right to privacy; the relative importance of  
88 household contact investigation when weighed against potential negative impacts; willingness to  
89 participate in household contact investigation; family and household dynamics; duty to others health  
90 within the household; and beliefs about TB/HIV confection. For focus groups, the study team  
91 developed a facilitator guide to elicit discussions on community-level perceptions and norms  
92 regarding the ethics of household contact investigation (Supplementary File 2). Focus group guides  
93 were structured to explore the following domains: methods for reducing TB-related stigma among  
94 people with TB and their families; belief as to whether contact investigation should be  
95 mandatory/optional/not performed; and relative stigma of TB and HIV and the risk of stigmatizing  
96 people for either TB or TB and HIV by offering HIV testing as part of HCI.

### 97 *Analysis*

98 A senior researcher conducted thematic analysis, M.M., experienced in qualitative methodologies,  
99 and a junior researcher, L.M.M., with support from N.S.W. A list of initial codes was generated by  
100 (M.M) and reviewed by (N.S.W) based on the study aim and questions from the semi-structured  
101 interview and focus group discussion guides. New codes were developed during analysis in response  
102 to emerging themes. This strategy allowed for an inductive and deductive approach to coding and  
103 analysis. Two South African analysts (L.M.M. and M.M.) reviewed the codebook to ensure

104 agreement before coding, and it was re-assessed throughout the coding process. Both analysts had  
105 knowledge about the study but were not part of the parent study or data collection process.

106 The codebook and transcripts were imported into ATLAS.ti© analytical software for coding. Coding  
107 was done by (L.M.M.) with regular discussion with the study team regarding data interpretation.

108 Codes were connected and sorted into identified themes and summarised into a tabular format with  
109 participant quotes. Two analysts (L.M.M and M.M) reviewed the tables to refine themes further. The  
110 analysts practiced reflexivity throughout the analysis by discussing and acknowledging their position  
111 and experiences as South African TB researchers and their experiences with and perceptions of HCI.

112 Findings were examined by data collection method (IDIs, FGDs) and location but are not  
113 differentiated as such here unless noted because of consistency across these categories.

114 Final themes were reviewed and discussed by the entire analysis team to provide a deeper  
115 understanding of the contribution of each theme to the overall research goals (19). A social-  
116 ecological model was used to situate the results and demonstrate the multilevel ethical factors  
117 intertwined with HCI for individuals, households, and communities (20, 21).

#### 118 *Ethics statement*

119 The study was approved by the Human Research Ethics Committee at the University of the  
120 Witwatersrand (Ethics reference: 1909111B), and by the Institutional Review Board at the Johns  
121 Hopkins Bloomberg School of Public Health (IRB reference: 11124). All participants provided written  
122 informed consent before enrolment.

#### 123 **Results**

124 IDI participants included ten men and 14 women with a median age of 32 (IQR 29,55) years. Focus  
125 group discussion participants were 20 men and 19 women with a median age of 43 (IQR 30,60)  
126 years. Participants included 27 people diagnosed with TB and 36 household members (participant  
127 demographics are presented in Table 1, see Appendix 1). Overall, people with TB and household

128 members of people with TB described varied perceptions of the impact of HCI in the context of  
129 critical ethical considerations. Participants discussed the largely positive role of HCI in health service  
130 delivery and access and aiding in fear reduction by delivering information about TB and transmission  
131 prevention at the household level. By contrast, participants also noted the negative impact HCI has  
132 concerning the perceptions of concurrent TB and HIV testing as well as TB and HIV-related stigma.  
133 Figure 1 presents key themes within the social-ecological model.

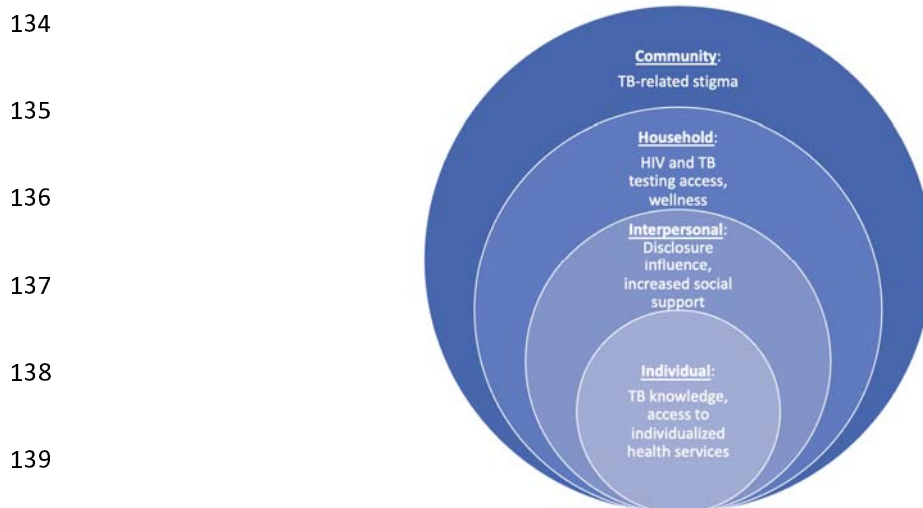

140 **Figure 1. Key themes situated in the social-ecological model.** Thematic analysis was used to derive  
141 key themes from the FGDs (n=6) and the IDIs (n=24). The key themes are presented within the  
142 social-ecological model to understand the range of ethical factors intertwined with the  
143 implementation of HCI within the individual, community, household, and interpersonal levels. HCI  
144 had a positive impact on the individual and interpersonal level, providing education and access to  
health services as well as aided disclosure of TB status and social support. Within household and  
community levels, HCI decreased interest in testing for HIV and increased TB and HIV-related  
stigma.

145 *HCI as a means of reducing barriers for individuals accessing services*

146 According to participants, HCI was viewed positively, playing a pivotal role in ensuring that people  
147 with TB and their household members receive timely access to care and TB-related services. People  
148 with TB and their household members described HCI as cost-saving, reassuring, and less time-  
149 consuming than seeking TB screening through the clinic.



150 *“I think it’s important that they often come and check on us because some people don’t like*  
151 *going to the clinic; from what I have seen, it’s difficult because we almost lost a person... I*  
152 *think it’s good because at home, we will be thinking that he [household member with a TB*  
153 *diagnosis] is the one who is sick and we are not sick. So he is the one who needs to get help,*  
154 *but when they came at home they were also able to assist us and we got assistance. Because*  
155 *they are also saving us transport to go to the clinic for all of us to go and get tested.” –*

156 Household member

157 HCI was considered impactful by many participants because it reached key groups like older adults  
158 or individuals who might be sick but for various reasons (e.g., unaware of TB symptoms, perceived  
159 their illness as minor, or feared being seen by the community at the clinic) were hesitant to seek  
160 care. Therefore, HCI was perceived as one of the most beneficial programs within the health system  
161 to reduce barriers to accessing TB-related screening and health services.

162 *Increased individual TB knowledge and reduced fear*

163 Both people with TB and household member participants noted that at the level of the individual,  
164 HCI provided direct knowledge about TB and taught household members how to live with someone  
165 who has TB, which could, in turn, positively impact interpersonal relationships and potentially  
166 minimize within-household discrimination. A participant described how HCI provided reassurances  
167 to people with TB and their household members who had concerns about transmitting or  
168 contracting TB:

169 *“The house visits also motivate your family... Because you are bringing education to them, so*  
170 *that they know that this person is our patient, and what you need to know is that you must*  
171 *live with this person like this, and like that... And you as well, as they have explained to you*  
172 *that you need to do this and that so that you don’t infect others...” - Person with TB*

173 *Interpersonal relationships: duty, responsibility, disclosure, and support*

174 Many participants, both people with TB and household members, described the importance of  
175 family health and how HCI influenced communication and actions among household members. First,  
176 some participants described the knowledge that HCI visits would be conducted as a catalyst for the  
177 disclosure of TB status to the family. However, others reported disclosing their status to their family  
178 members regardless of whether a HCI visit was made. Importantly, disclosing one's TB status was  
179 believed to undoubtedly alleviate the stress of suffering alone because *"a secret sometimes kills."*  
180 Second, many participants emphasized that knowing HCI would take place helped people with TB  
181 consider household safety and their role in decreasing the likelihood of TB transmission to others.  
182 Third, participants strongly expressed that the person with TB had a responsibility to disclose to  
183 others and play a role in the prevention of TB and screening for household members, which HCI  
184 facilitated:

185 *"...You either protect this household people that live with a person with TB too. As they say,*  
186 *prevention is better than cure. If they don't have TB, then they have to know that they don't*  
187 *have TB. And then if they have, they can be tested for that too."* - Person with TB

188 Despite the perceived beneficial role that HCI played in facilitating disclosure of TB status, some  
189 participants noted that disclosure could also result in discrimination within the household. Most  
190 participants viewed a person with TB rejecting HCI for their household as the result of either  
191 unawareness of the infectiousness of TB or associated with fear of negative household or  
192 community perceptions. For many participants, HCI as an approach was described as something that  
193 strongly enhanced a sense of responsibility for the household and personal health.

194 Some people with TB felt that HCI could often reduce household members' concerns about TB  
195 infection by providing the necessary health information, thus facilitating a cohesive and supportive  
196 space in which to care for persons living with TB.

197 *"We are the ones that benefit. Like you are teaching us about TB. They are also telling us*  
198 *[about TB] at the clinics as well, but they only telling us half [of the information], right? Like*

199            *with you guys, you encourage [educate] us, on how to live, what to eat...How to live with the*  
200            *people we live with in the household.”- Household member*

201    Participants felt that the motivation to disclose TB status and subsequent counseling received from  
202    HCI helped increase the level of family support offered to people with TB by empowering household  
203    members to hold people with TB accountable for adhering to treatment, assist with the collection of  
204    medication, and provide support through the provision of meals.

205    *Household uptake of HIV Testing during HCI*

206    HIV testing is a standard service often offered as part of the care package during a HCI visit.  
207    Participant perceptions of the HCI approach were intertwined with feelings about HIV testing. Both  
208    people with TB and household members described how HIV testing being linked to HCI could  
209    negatively impact a household’s decision to participate in HCI:

210            *“...TB currently; when you go test for it, they automatically test your HIV status... I think a*  
211            *person who is not ready for that. If they haven’t fallen sick, hasn’t had any symptoms... that*  
212            *is what could make them say they aren’t ready for [HIV testing]...So, you find that even if*  
213            *they want to check/test for TB only, they will say that they also going to test me for [HIV]-...*  
214            *So, I am not ready...” – Person with TB*

215    Participants felt that household members who would be less comfortable with the HCI approach also  
216    feared “*knowing the truth*” regarding their HIV status. Despite the noted challenge concerning the  
217    impact of offering HIV testing on TB screening/testing uptake, most participants acknowledged the  
218    importance of testing for HIV. Further, many participants also described that HIV testing as part of  
219    HCI may offer privacy, discretion, and convenience as described by a household member of a person  
220    with TB:

221           *“When they say ‘can we also check you on this’ they are not only helping themselves but they*  
222           *are also helping you. That’s why you have to agree so that you can know where you stand,*  
223           *yes.” – Household member*

224

#### 225 *The Role of Community Stigma*

226 Most participants considered HCI an important approach for finding new cases of TB and recognized  
227 the importance of identifying people with TB in their households or communities; however, nearly  
228 all participants raised concerns about community perception and potential stigma. Descriptions of  
229 stigma primarily focused on the community, as opposed to stigmatization within the household.  
230 Overall, HCI was perceived to contribute to or exacerbate illness-related stigma because healthcare  
231 workers visiting households in marked cars and typically wearing uniforms were viewed as  
232 demonstrating to neighbors or other community members that someone within the household was  
233 sick. Many participants described being seen by others with healthcare workers visiting the  
234 household as potentially distressing because this might change a person’s ‘social identity’, labeling  
235 them as someone with an illness.

236           *“...like when they come, we know that obviously, it’s those people wearing like obviously*  
237           *maybe those blue things or whatever... Yes, that uniform of theirs... They can see that “oh it*  
238           *means that in there, like when they [the healthcare workers] go there each and every day–...*  
239           *it means there is someone who is ill in there [at that particular house]” ... So, people are*  
240           *ashamed because of that thing...” - Household member*

241 Within discussions of stigma, participants described two distinct but overlapping types of potential  
242 stigma: 1) HIV-related stigma, noting that people with TB were sometimes believed to have HIV  
243 because of known high co-occurrence and overlapping symptoms such as loss of weight and  
244 coughing, and 2) TB-related stigma. Several participants described how their communities were

245 uninformed about TB, including the medical journey from TB diagnosis to treatment and the  
246 likelihood of being cured. Participants strongly emphasized that HCI could play a role in educating  
247 people about TB and HIV.

248 *“...Just judging...So automatically, when they see you coughing or see that you have lost*  
249 *weight or you have TB, they say ‘oh well she/he says it is TB, but she/he knows what it goes*  
250 *together with [HIV]’...it depends on people’s understanding about that thing [TB and HIV]...A*  
251 *person who doesn’t understand, who has little knowledge, is going to combine them...But*  
252 *one who has full knowledge and a lot, won’t combine them...The thing about when we get to*  
253 *the homes, we have to educate people...” – Person with TB*

254 Overall, participants noted that the stigma driven by HCI may isolate people and households with TB  
255 because fear of TB and HIV-related stigma is pervasive in communities.

## 256 **Discussion**

257 The findings from this qualitative study demonstrate that HCI, a recommended approach to  
258 identifying people with TB, is perceived as having largely positive impacts at the household level but  
259 potential negative implications concerning community and HIV stigma. HCI fosters social support,  
260 reduces barriers to screening and healthcare engagement, and may facilitate the disclosure of TB  
261 diagnosis. However, the HCI approach is perceived as a potential driver of health-related stigma  
262 within the community. Overall, HCI as a programmatic approach has impacts beyond identifying and  
263 screening individuals for TB, spanning the interpersonal, household, and community levels.

264 Governments must deliver TB services, fulfilling the human right to healthcare (11). However,  
265 traditional or “passive” identification of people with TB (e.g., relying on individuals to go to the clinic  
266 for screening or care) presents challenges, including access to the health facility for timely  
267 identification of TB symptoms (3). A study in South Africa on healthcare access found that most  
268 individuals, particularly those living in low-income communities, postponed seeking healthcare due

269 to distance from facilities and travel costs (7). Many participants in our study felt HCI had an  
270 essential role for the individual because it reduced noted structural and economic barriers to TB  
271 screening. Both persons with TB and household members highlighted how HCI, compared to clinic-  
272 based care, helps avoid long queues (5) and alleviates travel costs, (7, 8) thus improving the timely  
273 screening of TB and supporting the use of HCI in high-burden TB settings.

274 In our study, participants emphasized the utility of HCI in educating households, including household  
275 members and people with TB, on TB symptoms, treatment, and transmission. A study conducted in  
276 Free State, South Africa, found that educating people with TB about the disease positively influenced  
277 treatment adherence (4). Additionally, household TB knowledge is crucial for understanding TB  
278 infectivity and supporting prevention behavior (15). In Uganda, TB knowledge helped people with TB  
279 understand and make informed decisions, including protecting themselves and their close contacts  
280 from TB transmission (22). People with TB have reported experiencing stigma and withheld support  
281 within the household (23); in our study, participants described how HCI facilitated the sharing of TB  
282 diagnosis with close contacts despite the potential stigma. HCI also provides both education and  
283 reassurance to household members and people with TB, which may help mitigate household-level  
284 stigma (6, 23). In this case, decision-makers must balance the need to educate and counsel persons  
285 with TB and reduce barriers to testing their close contacts against the potential unintended adverse  
286 effects of increasing community-level stigma (11).

287 Stigma continues to obstruct the fight against TB, including the implementation of interventions  
288 such as HCI (24). For example, studies conducted in South Africa assessing the level of vulnerability  
289 and stigma experienced by people with TB found that TB interventions (both passive case finding  
290 and contact tracing) were often hampered because of factors such as negative community  
291 perceptions, the anticipated HIV-TB stigma and the association of TB with dirt (24, 25). Similar to  
292 other studies conducted in South Africa (3), our findings support evidence that people with TB and  
293 household members have mixed feelings about healthcare workers conducting household visits;

294 specific concerns included the use of marked cars, uniforms that identify visiting healthcare workers,  
295 and neighbor perceptions that there is a sick person in the household. Ultimately, screening  
296 programs can unintentionally disclose the identity of people with TB (26), and while participants in  
297 our study described the benefits of HCI within their household as significant, concerns about  
298 community stigma – both HIV and TB-related - tempered enthusiasm for the approach. TB and HIV  
299 stigma ultimately remain significant yet are under-addressed problems in TB programming. Given  
300 that HCI programs potentially play a direct role in increasing stigma in communities for people with  
301 and affected by TB, stigma-mitigating interventions are crucial to prevent shame and discrimination.  
302 Such interventions can include educating and providing psychosocial interventions (e.g.,  
303 psychosocial support groups or TB clubs) targeted towards communities, healthcare workers, and  
304 people living with TB; training healthcare workers on sensitivity and stigmatization; and considering  
305 policy interventions to measure and reduce TB stigma (21, 24, 27).

306 In line with other studies in high TB and HIV burden settings, our findings demonstrate that stigma  
307 among people with TB may be driven by the assumption that all individuals with TB are also living  
308 with HIV (24, 25, 28). In South Africa, efforts to integrate TB and HIV screening have led to the use of  
309 cost-effective methods like HCI to identify more individuals with both TB and HIV, reduce  
310 transmission, and improve clinical outcomes (29, 30). While this is a critical approach given that an  
311 estimated 71% of people diagnosed with TB in South Africa also have HIV (31), HIV-associated stigma  
312 may negatively impact the uptake of TB services (12, 32). A study conducted in Eastern Cape, South  
313 Africa, reported that people with TB were often assumed to be living with HIV, which impacted TB  
314 treatment adherence and care by discouraging people from going to the clinic for care and complete  
315 treatment (28). Importantly, we found that the association between TB and HIV was a factor that  
316 could influence a household's decision to accept or reject HCI because of the provision of HIV  
317 testing. While integrated screening intends to reduce the burden of both TB and HIV, participants  
318 described significant HIV stigma concerns and the pressure driven by HCI to test for HIV. These  
319 findings demonstrate that, while offering HIV testing with HCI in high co-burden settings is a

320 reasonable approach from a disease prevention standpoint (33), the impact of this practice on HCI  
321 uptake remains poorly understood. Filling this knowledge gap will allow screening programs to make  
322 informed decisions about the provision of HIV testing as part of HCI and ensure HCI programs are  
323 people-centered.

324

### 325 **Limitations**

326 This study has limitations. First, South Africa is among the top 30 high-burden HIV/TB countries;  
327 thus, these findings may not generalize to settings with high TB burden but low HIV prevalence.  
328 Second, participants were sampled from a parent contact investigation study, which may have  
329 influenced opinions of the HCI approach compared to individuals with no exposure to HCI. However,  
330 as HCI is a commonly used approach in South Africa, study participants' views may not differ  
331 significantly from those of individuals not engaged in research. Finally, we did not find differences  
332 across the geographical areas (urban vs. rural) as expected, which may be the product of  
333 implementing a set of standardized questions that were not necessarily site-specific. However, we  
334 explored data across participant types and data collection methods (FGDs and IDIs), strengthening  
335 the rigor of our findings.

### 336 **Conclusion**

337 HCI as an approach has varying impacts on people with TB, their families, interpersonal  
338 relationships, and communities. This qualitative study suggests that HCI is broadly acceptable with  
339 perceived positive impacts on household health and TB knowledge, TB status disclosure, and social  
340 support for people with TB. However, the intersection of HCI and TB and HIV-related stigma is of  
341 critical importance to individuals impacted by TB and has been largely unaddressed in HCI  
342 implementation to date. The provision of HIV testing, in particular, may have negative consequences  
343 on the uptake of TB screening and needs to be better understood. If HCI is to be scaled up, more



344 significant efforts should be made to ensure concerns about community stigma and HIV testing are  
345 addressed.

#### 346 **Lists of abbreviation**

347 HCI Household Contact Investigation

348 TB Tuberculosis

349 HIV Human Immunodeficiency Virus

350 WHO World Health Organization

#### 351 **Declarations**

##### 352 **Ethics approval and consent to participate**

353 The study was approved by the Human Research Ethics Committee at the University of the  
354 Witwatersrand (Ethics reference: 1909111B) by the Institutional Review Board at the Johns Hopkins  
355 Bloomberg School of Public Health and conducted in compliance with the Declaration of Helsinki. All  
356 participants signed an informed consent form before being interviewed for this study.

##### 357 **Consent for publication**

358 Not applicable.

##### 359 **Competing interests**

360 The authors declare that they have no competing interests.

##### 361 **Funding**

362 The study was funded by the National Institute of Allergy and Infectious Diseases, Bethesda, MD,  
363 USA (grant number: R01AI147681). The funder had no role in the study design, data collection and  
364 analysis, decision to publish, or manuscript preparation.

365 **Authors' contributions**

366 LMM: Formal analysis, data curation, writing – original draft and editing; MM: Formal analysis,  
367 writing – original draft and editing; CH: Investigation, conceptualization, writing – review and editing;  
368 KWM: Study administration, data curation, writing – review and editing; MTM: Study  
369 administration, data curation, writing – review and editing; MPM: Study administration, data  
370 curation, writing – review and editing; NWA: Study administration, data curation, writing – review  
371 and editing; KA: Conceptualization, supervision, writing – review and editing; NM: Conceptualization,  
372 supervision, study administration, writing – review and editing; DWD: Investigation,  
373 conceptualization, funding acquisition, methodology, writing - review & editing, NSW: Methodology,  
374 study administration, formal analysis, data curation, writing – original draft and editing.

375 **Acknowledgments**

376 The authors thank the participants for their time and valuable insights. We thank C Ramsammy and J  
377 Coetzee for their help refining themes.

378

379

380

381

382

383

384

385

386

387

388

389

390

391

392

393 **References**

- 394 1. WHO. Global tuberculosis report 2022. [https://www.who.int/teams/global-tuberculosis-](https://www.who.int/teams/global-tuberculosis-programme/tb-reports/global-tuberculosis-report-2022)  
395 [programme/tb-reports/global-tuberculosis-report-2022](https://www.who.int/teams/global-tuberculosis-programme/tb-reports/global-tuberculosis-report-2022). 2022.
- 396 2. Lönnroth K, Castro KG, Chakaya JM, Chauhan LS, Floyd K, Glaziou P, et al. Tuberculosis  
397 control and elimination 2010–50: cure, care, and social development. *The lancet*.  
398 2010;375(9728):1814-29.
- 399 3. Kerrigan D, West N, Tudor C, Hanrahan CF, Lebina L, Msandiwa R, et al. Improving active  
400 case finding for tuberculosis in South Africa: informing innovative implementation approaches in the  
401 context of the Kharitode trial through formative research. *Health research policy and systems*.  
402 2017;15(1):1-8.
- 403 4. Moodley N, Saimen A, Zakhura N, Motau D, Setswe G, Charalambous S, et al. ‘They are  
404 inconveniencing us’-exploring how gaps in patient education and patient centred approaches  
405 interfere with TB treatment adherence: perspectives from patients and clinicians in the Free State  
406 Province, South Africa. *BMC Public Health*. 2020;20(1):1-10.
- 407 5. Harris B, Goudge J, Ataguba JE, McIntyre D, Nxumalo N, Jikwana S, et al. Inequities in access  
408 to health care in South Africa. *Journal of public health policy*. 2011;32:S102-S23.
- 409 6. Furin J, Loveday M, Hlangu S, Dickson-Hall L, le Roux S, Nicol M, et al. “A very humiliating  
410 illness”: a qualitative study of patient-centered Care for Rifampicin-Resistant Tuberculosis in South  
411 Africa. *BMC Public Health*. 2020;20(1):1-11.
- 412 7. Gordon T, Booyesen F, Mbonigaba J. Socio-economic inequalities in the multiple dimensions  
413 of access to healthcare: the case of South Africa. *BMC Public Health*. 2020;20(1):1-13.
- 414 8. McLaren ZM, Ardington C, Leibbrandt M. Distance decay and persistent health care  
415 disparities in South Africa. *BMC health services research*. 2014;14(1):1-9.
- 416 9. Fox GJ, Barry SE, Britton WJ, Marks GB. Contact investigation for tuberculosis: a systematic  
417 review and meta-analysis. *European Respiratory Journal*. 2013;41(1):140-56.
- 418 10. Huprich SK, Fuller KM, Schneider RB. Divergent ethical perspectives on the duty-to-warn  
419 principle with HIV patients. *Ethics & Behavior*. 2003;13(3):263-78.
- 420 11. Organization WH. Ethics guidance for the implementation of the End TB strategy. World  
421 Health Organization; 2017. Report No.: 9241512113.
- 422 12. Levin L, Irving K, Dikgang M, Punwasi J, Isaacs M, Myer L. TB patients' perspectives on  
423 integrated TB/HIV services in South Africa. *Tropical doctor*. 2006;36(3):173-5.
- 424 13. Kliner M, Knight A, Elston J, Humphreys C, Mamvura C, Wright J, et al. Development and  
425 testing of models of tuberculosis contact tracing in rural southern Africa. *Public health action*.  
426 2013;3(4):299-303.
- 427 14. Medina-Marino A, de Vos L, Bezuidenhout D, Denkinger CM, Schumacher SG, Shin SS, et al.  
428 “I got tested at home, the help came to me”: acceptability and feasibility of home-based TB testing  
429 of household contacts using portable molecular diagnostics in South Africa. *Tropical Medicine &*  
430 *International Health*. 2021;26(3):343-54.
- 431 15. Ayakaka I, Ackerman S, Ggita JM, Kajubi P, Dowdy D, Haberer JE, et al. Identifying barriers to  
432 and facilitators of tuberculosis contact investigation in Kampala, Uganda: a behavioral approach.  
433 *Implementation science*. 2017;12:1-13.

- 434 16. Shapiro AE, Variava E, Rakgokong MH, Moodley N, Luke B, Salimi S, et al. Community-based  
435 targeted case finding for tuberculosis and HIV in household contacts of patients with tuberculosis in  
436 South Africa. *American journal of respiratory and critical care medicine*. 2012;185(10):1110-6.
- 437 17. Vella V, Racalbuto V, Guerra R, Marra C, Moll A, Mhlanga Z, et al. Household contact  
438 investigation of multidrug-resistant and extensively drug-resistant tuberculosis in a high HIV  
439 prevalence setting. *The International journal of tuberculosis and lung disease*. 2011;15(9):1170-5.
- 440 18. Machavariani E, Nonyane B, Lebina L, Mmolawa L, West N, Dowdy D, et al. Perceived stigma  
441 among people with TB and household contacts. *The International Journal of Tuberculosis and Lung  
442 Disease*. 2023;27(9):675-81.
- 443 19. Braun V, Clarke V. Using thematic analysis in psychology. *Qualitative research in psychology*.  
444 2006;3(2):77-101.
- 445 20. Yakob B, Ncama BP. A socio-ecological perspective of access to and acceptability of HIV/AIDS  
446 treatment and care services: a qualitative case study research. *BMC public health*. 2016;16(1):1-15.
- 447 21. Foster I, Galloway M, Human W, Anthony M, Myburgh H, Vanqa N, et al. Analysing  
448 interventions designed to reduce tuberculosis-related stigma: A scoping review. *PLOS Global Public  
449 Health*. 2022;2(10):e0000989.
- 450 22. James A. *Measuring TB Stigma in Kampala, Uganda*: Yale University; 2020.
- 451 23. Kallon II, Colvin CJ. A qualitative exploration of continuity of TB care in clinics after discharge  
452 from hospitals in Cape Town, South Africa. *BMC Health Services Research*. 2022;22(1):1489.
- 453 24. DeSanto D, Velen K, Lessells R, Makgopa S, Gumede D, Fielding K, et al. A qualitative  
454 exploration into the presence of TB stigmatization across three districts in South Africa. *BMC public  
455 health*. 2023;23(1):504.
- 456 25. Murray EJ, Bond VA, Marais BJ, Godfrey-Faussett P, Ayles HM, Beyers N. High levels of  
457 vulnerability and anticipated stigma reduce the impetus for tuberculosis diagnosis in Cape Town,  
458 South Africa. *Health policy and planning*. 2013;28(4):410-8.
- 459 26. Fox GJ, Dobler CC, Marks GB. Active case finding in contacts of people with tuberculosis.  
460 *Cochrane Database of Systematic Reviews*. 2011(9).
- 461 27. Nuttall C, Fuady A, Nuttall H, Dixit K, Mansyur M, Wingfield T. Interventions pathways to  
462 reduce tuberculosis-related stigma: a literature review and conceptual framework. *Infectious  
463 Diseases of Poverty*. 2022;11(1):101.
- 464 28. Møller V, Erstad I. Stigma associated with tuberculosis in a time of HIV/AIDS: narratives from  
465 the Eastern Cape, South Africa. *South African Review of Sociology*. 2007;38(2):103-19.
- 466 29. Gilbert JA, Long EF, Brooks RP, Friedland GH, Moll AP, Townsend JP, et al. Integrating  
467 community-based interventions to reverse the convergent TB/HIV epidemics in rural South Africa.  
468 *PLoS One*. 2015;10(5):e0126267.
- 469 30. Gilbert JA, Sheno SV, Moll AP, Friedland GH, Paltiel AD, Galvani AP. Cost-effectiveness of  
470 community-based TB/HIV screening and linkage to care in rural South Africa. *PLoS One*.  
471 2016;11(12):e0165614.
- 472 31. CDC. Global HIV and TB: South Africa: Centers for Disease Control and Prevention 2021  
473 [updated September 30, 2021. Available from: [https://www.cdc.gov/globalhivtb/where-we-  
474 work/southafrica/southafrica.html](https://www.cdc.gov/globalhivtb/where-we-work/southafrica/southafrica.html).
- 475 32. Wouters E, van Rensburg AJ, Engelbrecht M, Buffel V, Campbell L, Sommerland N, et al. How  
476 the 'HIV/TB co-epidemic–HIV stigma–TB stigma' syndemic impacts on the use of occupational health  
477 services for TB in South African hospitals: a structural equation modelling analysis of the baseline  
478 data from the HaTSaH Study (cluster RCT). *BMJ open*. 2022;12(4):e045477.
- 479 33. Albaugh NW, Nonyane BA, Mmolawa L, Siwelana T, Lebina L, Dowdy DW, et al. Proportion  
480 and predictors of adult TB contacts accepting HIV testing during an active TB case finding  
481 intervention in South Africa. *Journal of acquired immune deficiency syndromes (1999)*.  
482 2020;85(5):525.

483

484

485

486

487

488

489 **Appendix 1. Participant demographics**

| DISTRICT                       | PARTICIPANT TYPE | AGE RANGE (years) | GENDER | HIV STATUS |
|--------------------------------|------------------|-------------------|--------|------------|
| <b>In-depth Interviews</b>     |                  |                   |        |            |
| Soshanguve                     | Person with TB   | 40-59             | M      | Negative   |
| Soshanguve                     | Person with TB   | 25-39             | F      | Positive   |
| Soshanguve                     | Person with TB   | 40-59             | F      | Positive   |
| Soshanguve                     | Person with TB   | 60+               | M      | Positive   |
| Vhembe                         | Person with TB   | 18-24             | M      | Negative   |
| Vhembe                         | Person with TB   | 25-39             | F      | Positive   |
| Vhembe                         | Person with TB   | 40-59             | F      | Positive   |
| Vhembe                         | Person with TB   | 25-39             | M      | Negative   |
| Capricorn                      | Person with TB   | 60+               | F      | Negative   |
| Capricorn                      | Person with TB   | 25-39             | M      | Negative   |
| Capricorn                      | Person with TB   | 25-39             | F      | Negative   |
| Capricorn                      | Person with TB   | 25-39             | M      | Negative   |
| Soshanguve                     | Household member | 25-39             | F      | Positive   |
| Soshanguve                     | Household member | 25-39             | F      | Positive   |
| Soshanguve                     | Household member | 60+               | M      | Positive   |
| Soshanguve                     | Household member | 25-39             | M      | Positive   |
| Vhembe                         | Household member | 60+               | F      | Unknown    |
| Vhembe                         | Household member | 40-59             | F      | Negative   |
| Vhembe                         | Household member | 25-39             | F      | Negative   |
| Vhembe                         | Household member | 25-39             | F      | Positive   |
| Capricorn                      | Household member | 40-59             | F      | Negative   |
| Capricorn                      | Household member | 25-39             | F      | Negative   |
| Capricorn                      | Household member | 60+               | M      | Unknown    |
| Capricorn                      | Household member | 18-24             | M      | Negative   |
| <b>Focus Group Discussions</b> |                  |                   |        |            |
| Soshanguve                     | Person with TB   | 60+               | F      | Positive   |
| Soshanguve                     | Person with TB   | 40-59             | M      | Positive   |

|            |                  |       |   |          |
|------------|------------------|-------|---|----------|
| Soshanguve | Person with TB   | 60+   | M | Positive |
| Soshanguve | Person with TB   | 40-59 | M | Positive |
| Soshanguve | Person with TB   | 25-39 | M | Negative |
| Soshanguve | Person with TB   | 60+   | M | Positive |
| Vhembe     | Person with TB   | 25-39 | M | Positive |
| Vhembe     | Person with TB   | 40-59 | M | Negative |
| Vhembe     | Person with TB   | 40-59 | M | Positive |
| Vhembe     | Person with TB   | 25-39 | F | Unknown  |
| Capricorn  | Person with TB   | 40-59 | F | Positive |
| Capricorn  | Person with TB   | 40-59 | M | Negative |
| Capricorn  | Person with TB   | 25-39 | M | Negative |
| Capricorn  | Person with TB   | 25-39 | M | Negative |
| Capricorn  | Person with TB   | 25-39 | M | Negative |
| Soshanguve | Household member | 25-39 | F | Positive |
| Soshanguve | Household member | 40-59 | M | Positive |
| Soshanguve | Household member | 40-59 | F | Positive |
| Soshanguve | Household member | 40-59 | F | Positive |
| Soshanguve | Household member | 60+   | F | Positive |
| Soshanguve | Household member | 40-59 | F | Positive |
| Soshanguve | Household member | 60+   | F | Positive |
| Vhembe     | Household member | 25-39 | M | Negative |
| Vhembe     | Household member | 60+   | M | Unknown  |
| Vhembe     | Household member | 25-39 | F | Unknown  |
| Vhembe     | Household member | 25-39 | M | Unknown  |
| Vhembe     | Household member | 18-24 | F | Positive |
| Vhembe     | Household member | 60+   | M | Positive |
| Vhembe     | Household member | 60+   | F | Unknown  |
| Vhembe     | Household member | 18-24 | F | Negative |
| Vhembe     | Household member | 25-39 | F | Positive |
| Capricorn  | Household member | 40-59 | M | Positive |

|           |                  |       |   |          |
|-----------|------------------|-------|---|----------|
| Capricorn | Household member | 60+   | F | Positive |
| Capricorn | Household member | 60+   | M | Positive |
| Capricorn | Household member | 40-59 | F | Positive |
| Capricorn | Household member | 25-39 | F | Positive |
| Capricorn | Household member | 25-39 | F | Negative |
| Capricorn | Household member | 25-39 | M | Negative |
| Capricorn | Household member | 18-24 | F | Positive |

490

491



492 **Supplementary File 1**

493 **Ethics of household contact investigation in South Africa: interview guide**

494 **Kharituwe Bioethics Supplement**

495 **In-depth Interview Guide Version 1.0/ 13 October 2020**

496 **Introduction:**

497

498 *Thank you for being here today. I want to remind you before we start talking, there are no right or*  
499 *wrong answers. I am here to learn from you and hear your ideas and suggestions.*

500

501 **Open-ended questions:**

502

503 *As you know, today we are going to speak about tuberculosis (TB), which is an infectious disease that*  
504 *mainly affects the lungs. Often people with TB have a cough, fever or weight loss – sometimes they*  
505 *may have TB for months or even years without knowing it. TB is spread from one person to another*  
506 *through the air. Because people often spend time with their household members, if one household*  
507 *member has TB and is coughing, other household members may also get TB. There is a cure for TB,*  
508 *and testing and treatment are free at the clinic.*

509

510 *One of the ways that is often used to find more people with TB and tell them about their treatment*  
511 *options is for health workers to visit the household of a person with a recent diagnosis of TB and*  
512 *check the other people who live in the household for TB. This may involve asking people if they have*  
513 *any of the symptoms of TB and taking a sputum sample from people who have TB symptoms. This way*  
514 *of finding new cases of TB is called household contact investigation. Often household members are*  
515 *also asked if they would like to be tested for HIV at these household visits.*

516

517 *Let's start with getting some of your thoughts about household visits to check people for TB.*

518

519 1. I'd like to first start by asking what you think of health workers visit to the households of people  
520 who have TB to check other household members for TB?

521

522 Probe: Do you think it is important for health workers to visit the households of people who have TB  
523 to check other household members for TB?

524

525 Probe: Please explain to me whether you think visiting the households of people who have TB to  
526 check household members for TB is a good or bad way to find new cases of TB?

527

528 Probe: What would you propose as a different way to finding new cases of TB other than healthcare  
529 workers visiting homes to check household members for TB?

530

531 Probe: What are the benefits of visiting the households of people who have TB to check household  
532 members for TB?

533

534 Probe: What are some things that might not be good about visiting the households of people who have  
535 TB to check household members for TB?

536 Probe: If health workers do not visit the households of people who have TB to check their household  
537 members, what might happen?

538

539 2. [For index cases only]: Can you tell me how you felt or would feel about having someone come to  
540 your house to check other household members for TB?

541

542 [For contacts only]: If or when someone in your household was diagnosed with TB, can you tell  
543 me how you felt or would feel about having someone come to your house to check you and other  
544 household members for TB?

545

546 Probe: Do you think everyone in your household would feel comfortable having someone come to the  
547 house to check household members for TB? Why or why not? Which people would or would not feel  
548 comfortable with this, and why?

549

550 Probe: Please describe any concerns you would have about having someone come to the house to  
551 check household members for TB?

552

553 Probe: What are the reasons that people may or may not want to be checked for TB in the household?

554

555 3. I would like to hear your thoughts about, when a health worker comes to the household of  
556 someone recently diagnosed with TB to check other household members for TB, how that health  
557 worker should explain the reason for the visit. What do you think the health worker should say to  
558 the household members about the reason for their visit, and why?

559

560 Probe: Please tell me about the good or the bad things about the health worker saying the reason for  
561 the visit is because someone in the household has been diagnosed with TB and invited us to come.

562

563 Probe: Please tell me about the good or the bad things about the health worker saying the reason for  
564 the visit is because they are trying to test for TB in selected households in this community.

565

566 4. [Index case only]: Did you tell your household members that you have TB?? Why or why not?

567

568 Probe: (If yes to Question 4) Please tell me about your experience telling your household members  
569 that you were diagnosed with TB.

570

571 Probe [index case only]: Please describe anything that worried you about telling your household  
572 members that you had TB? Were there any household members who you decided not to tell? Why did  
573 you not want to tell these people?

574

575 Probe [index case only, if they did disclose]: Please describe how household members reacted when  
576 you told them about your TB diagnosis.

577

578 [Contact only]: Were you told by anyone that a member of your household was diagnosed with  
579 TB? [If yes,] please tell me about your experience finding out that your household member had  
580 TB. [If no,] if someone in your household was diagnosed with TB, would you want to know – and  
581 if so, how would you like to be told? Please explain why.

582

583 Probe [contact only]: How did or would you feel when you found out or if you were to find out your  
584 household member had TB?

585

586 Probe [contact only]: How did or would you react when you found out or if you were to find out your  
587 household member had TB?

588

589 Probe [contact only]: Please describe any worries or concerns you had or would have when you found  
590 out or if you were to find out your household member had TB?

591

592 5. [Index case only]: Please tell me about the reasons for your decision to tell your household  
593 members that you had been diagnosed with TB?

594

595 Probe: Please describe to me if you had in mind the health of your household members when thinking  
596 about whether to tell them about your TB diagnosis.

597

598 Probe: Please tell me about anything that made you not want to tell your household members about  
599 your TB diagnosis.

600

601 Probe: Please tell me about how knowing that health care workers might come to your house  
602 influenced your decision of whether or not to tell your household members about your TB status.

603

604 6. [Index case only]: I would like to know more about your experience after you were diagnosed  
605 with TB. In general, how do you feel you are treated in your community because of your TB  
606 diagnosis?

607

608 Probe: Do your family members know about your diagnosis? How are you (would you be) treated by  
609 your family after learning of this diagnosis?

610

611 Probe: Do your close neighbors know about your diagnosis? How are you (would you be) treated by  
612 neighbors after learning of this diagnosis?

613

614 Probe: Do your close friends know about your diagnosis? How are you (would you be) treated by  
615 friends after learning of this diagnosis?

616

617 7. Please tell me about how you think having someone come to the house to check household  
618 members for TB might impact how you are treated in your community?  
619

620 Probe: If people in your community notice someone is coming to the house to check for TB, please  
621 describe whether they might treat you differently?

622

623 Probe: Do you think their reaction might be different if they were visited by people in plain clothes  
624 and unmarked cars versus in uniforms and marked cars?

625

626 Probe: How do people in this community think about someone's TB status in relationship to their HIV  
627 status? If they know that someone has been diagnosed with TB, will they assume that person has HIV  
628 as well?

629

630 Probe: Please describe how you think people in this community feel about someone who has TB?

631

632 8. Do you think people in this community would discuss their TB diagnosis with others? Why or  
633 why not?  
634

635 Probe: What are the reasons someone might not want to tell others in the community that they have  
636 been diagnosed with TB?

637

638 *For the final part of our discussion, I am going to ask you about different timings of household*  
639 *contact investigation. Each involves having a health worker visit the household, but the timing of*  
640 *these visits are different in the three types. As I mentioned earlier, when I say household contact*  
641 *investigation I mean when health workers visit the household of a person with a recent diagnosis of*  
642 *TB and check the other people who live in the household for TB, and usually offer HIV testing as well.*  
643 *We are interested in your thoughts.*

644

645 *The first time that health workers could come and visit households after someone was diagnosed with*  
646 *TB is during normal business hours (9:00-17:00). This is what is currently done in places where TB*  
647 *contact investigation is done. A different time when health workers could visit instead would be in the*  
648 *evenings and on the weekends, when some people might be more likely to be home. And another*  
649 *possibility for timing, instead, is to visit on the holidays like the festive season or Easter. This holiday*  
650 *approach might have the benefit of having large families home during those times, but would also*  
651 *potentially involve delays (for example, if someone were diagnosed with TB in July and couldn't be*  
652 *visited until December). Do you have any questions about these types of household visits before we go*  
653 *further?*

654

655 *Now let's talk in more detail about each of these types of household visits...*

656

657 Note: Ask the following questions for each type of household visit (holiday, off-peak, and routine).  
658 Remind of participant of the definition for each type of household visit.

659

660 9. What do think about this type of visit to households of people who have TB to check other  
661 household members for TB?  
662

663 Probe: What are the benefits of this type of visit to households of people who have TB to check other  
664 household members for TB?

665

666 Probe: What are the things that might not be good about this type of visit to households of people who  
667 have TB to check other household members for TB?

668

669 Probe: Please describe anything that would make you uncomfortable about this type of visit to  
670 households of people who have TB to check other household members for TB.

671

672 Probe: Please describe anything that would be good about this type of visit to households of people  
673 who have TB to check other household members for TB.

674

675 10. What do you think about offering HIV testing to others in the household when visiting the  
676 household during this type of visit to check for TB?  
677

678 Probe: Please describe for me any problems there might be if health workers offer HIV testing at the  
679 same time as they come to check household members for TB.

680

681 Probe: Please tell me about anything that you think is good about having HIV testing offered to  
682 household members at the same time they are being checked for TB.

683

684 11. Thinking about all three types of household visits – holiday, off-peak, and routine – which  
685 approach do you think is best, and why?  
686

687 Probe: Tell me about your choice...what would make that the best type over the others?

688

689

690 *Thank you for your time...this information has been very valuable.*

691

692

693 **Supplementary File 2**

694 **Ethics of household contact investigation in South Africa: focus group discussion guide**

695 **Kharituwe Bioethics Supplement**

696 **Focus Group Discussion Guide Version 1.0/ 13 October 2020**

697

698 **Introduction:**

699 *Thank you all for being here today. I want to remind everyone before we start talking that there are*  
700 *no right or wrong answers. We are here to learn from you and hear your ideas and suggestions. We*  
701 *want all of you to tell us what you think and learn from you and your experiences.*

702 *\_\_\_\_\_ will lead the discussion today by asking a question to the whole group*  
703 *and call on people to get their thoughts. We want to hear from everyone. \_\_\_\_\_ will*  
704 *be taking notes while we talk.*

705 *Does anyone have any questions before we start?*

706 **Open-ended questions:**

707 *As you know, today we are going to speak about tuberculosis (TB), which is an infectious disease that*  
708 *mainly affects the lungs. Often people with TB have a cough, fever or weight loss – sometimes they*  
709 *may have TB for months or even years without knowing it. TB is spread from one person to another*  
710 *through the air. Because people often spend time with their household members, if one household*  
711 *member has TB and is coughing, other household members may also get TB. There is a cure for TB,*  
712 *and testing and treatment are free at the clinic.*

713 *One of the ways that is often used to find more people with TB and let them know about it is for health*  
714 *workers to visit the household of a person with a recent diagnosis of TB and check the other people*  
715 *who live in the household for TB. This may involve asking people if they have any of the symptoms of*  
716 *TB and taking a sputum sample from people who have TB symptoms. This way of finding new cases of*  
717 *TB is called household contact investigation. Often household members are also asked if they would*  
718 *like to be tested for HIV at these household visits.*

719 *Let's start with getting some of your thoughts about household visits to check people for TB.*

720

721 1. As members of this community, please tell me what you think about having health workers visit the  
722 households of people who have TB?

723

724 Probe: Do you think it is important to have health workers visit the households of people who have TB? Why or  
725 why not?

726

727 Probe: Tell me about why you think this might be good for the households who are visited?

728

729 Probe: Tell me about why you think this might be good for the community?

730

731 Probe: How do you think having a health worker visit the household would make people feel?

732

733 Probe: Do you think people might feel pressured into doing something they don't want to do? Why?

734

735 2. Thinking about all the benefits and negatives, please tell me about if you think that visiting  
736 households of people who are diagnosed with TB is something that should be done?

737

738 Probe: Do you think it's something that clinics should focus on doing? Why or why not?

739

740 3. *I am going to present a scenario and I would like you all to tell me your thoughts about it:*

741 Please tell me what you think about a scenario where there is a household and the people who

742 stay there want to be checked for TB, but the person in the household who has been

743 diagnosed with TB decides they do not want the health workers to visit the household to

744 check everyone for TB.

745

746 Probe: What are the positive and negatives of someone with TB deciding that their household cannot

747 be visited and other household members checked for TB?

748 Probe: In your opinion, is it fair or unfair for the person with TB to make this decision, and why?

749

750 4. *I am going to present another scenario and I would like you all to tell me your thoughts*

751 *about it:* Please tell me what you think about a scenario where there is someone in the

752 household who has been diagnosed with TB, and only some of the family members want to be

753 checked for TB, but others do not want to?

754

755 Probe: Should the healthcare workers who are visiting ask people if they want to get tested for TB or

756 tell them that they should get tested?

757 Probe: Please tell me your thoughts on the responsibility of household members who have had contact

758 with the person who has been diagnosed with TB to get checked?

759

760 5. How does your community view people from outside of the community coming to

761 someone's house?

762

763 Probe: How do people in the community react or act when people from outside the community come

764 to someone's house?

765

766 6. Please tell me about how people in the community treat or act towards someone who they

767 know has been diagnosed with TB.

768

769 Probe: Describe for me how people in the community treat or act towards someone they know has TB

770 compared to someone who does not.

771

772 Probe: Describe for me how people in the community act towards household members of someone

773 who has TB.

774

775 7. Do you agree or disagree that people in this community make assumptions about the HIV

776 status of someone who has been diagnosed with TB or the HIV status of the household where

777 someone has TB? Please explain.

778



779 Probe: What do people in the community assume about someone's HIV status if they are diagnosed  
780 with TB, and why?

781

782 8. As members of this community, what do you think about offering HIV tests to all household  
783 members, when coming to visit a household for TB testing because a household member has  
784 TB?  
785

786 Probe: What are the things that are good about offering HIV tests to all household members?

787 Probe: What are the bad things or negatives about offering HIV tests to all household members?

788

789 9. Please tell me your thoughts on how household visits to check for TB among household  
790 members could be made less shameful to patients and household members?  
791

792 Probe: Tell me about things that the person or people visiting the home could do to not cause  
793 households to be stigmatized by individuals or the community?

794

795 *For the final part of our discussion, I am going to ask you about different timings of household*  
796 *contact investigation. Each involves having a health worker visit the household, but the timing of*  
797 *these visits are different in the three types. As I mentioned earlier, when I say household contact*  
798 *investigation I mean when health workers visit the household of a person with a recent diagnosis of*  
799 *TB and check the other people who live in the household for TB, and usually offer HIV testing as well.*  
800 *We are interested in your thoughts.*

801

802 *The first time that health workers could come and visit households after someone was diagnosed with*  
803 *TB is during normal business hours (9:00-17:00). This is what is currently done in places where TB*  
804 *contact investigation is done. The second time that health workers could visit would be in the evenings*  
805 *and on the weekends, when some people might be more likely to be home. The third time is on the*  
806 *holidays like the festive season or Easter. This approach might have the benefit of having large*  
807 *families home during those times, but would also potentially involve delays (for example, if someone*  
808 *were diagnosed with TB in July and couldn't be visited until December). Do you have any questions*  
809 *about these types of household visits before we go further?*

810

811 Note: Make use of a flip chart to note the positives and negatives of each strategy. Reference back to  
812 the flip chart to remind people of each type of contact investigation for questions asking them to  
813 compare all three.

814

815 *Now let's talk in more detail about each of these different types of timing...we'll start with the holiday*  
816 *one.*

817

818 10. How do you think this type of visit of going to the houses of people with TB to check others  
819 in the house for TB on the holidays will be accepted by this community?

820

821 Probe: Would people in this community be willing to have someone come to their household during  
822 the holidays to check for TB, and why or why not?

823 Probe: What concerns might people in this community have about health workers going to the houses  
824 of people with TB to check others in the house for TB on the holidays?

825

826 11. What are the things that people in this community might like about this type of visit?  
827

828 Probe: What are the benefits?  
829

830 12. What are some of the things that people in this community might not like about this type of  
831 visit to check people in the household for TB?  
832

833 Probe: What are the things that might not be good about this type of visit during the holidays?  
834

835 *Next let's talk about the off-peak timing [remind of definition].*  
836

837 13. How do you think going to the houses of people with TB to check others in the house for TB  
838 on the evenings and weekends will be accepted by this community?  
839

840 Probe: Would people in this community be willing to have someone come to their household evenings  
841 and weekends to check for TB, and why or why not?

842 Probe: What concerns might people in this community have about a health worker going to the houses  
843 of people with TB to check others in the house for TB on evenings and weekends?

844

845 14. What are the things that people in this community might like about this type of visit to check  
846 people in the household for TB?  
847

848 Probe: What are the benefits?  
849

850 15. What are some of the things that people in this community might not like about this type of  
851 visit to check people in the household for TB?  
852

853 Probe: What are the things that might not be good about this type of visit during evenings or  
854 weekends?  
855

856 *Moving on to the routine type of visit [remind of definition].*  
857

858 16. How do you think the routine type of visit is accepted by this community?  
859

860 Probe: Are people in this community be willing to have someone come to their household during  
861 normal business hours to check for TB, and why or why not?

862

863 Probe: What concerns do you think people in this community have about this type of visit to check  
864 people in the household for TB?

865

866 17. Thinking about all three types of timing for household visits – holiday, off-peak, and routine  
867 – which approach would you choose as the best for your community, and why?  
868

869 Probe: Tell me about your choice...what would make that the best type of timing over the others?

870

871 *Thank you all for your time...this information has been very valuable.*

872

873

874

875

876

877

878

879

880

881
